# Supplementary material
Source: PubMed Central journal article supplement (PMC7367765)
Supplement: NIHMS1588574-supplement-316461_Major_Resources_Table.pdf [file NIHMS1588574-supplement-316461_Major_Resources_Table.pdf]

## Major Resources Table

In order to allow validation and replication of experiments, all essential research materials listed in the Methods should be included in the Major Resources Table below. Authors are encouraged to use public repositories for protocols, data, code, and other materials and provide persistent identifiers and/or links to repositories when available. Authors may add or delete rows as needed.

### Animals (in vivo studies)

| Species | Vendor or Source | Background Strain | Sex | Persistent ID / URL |
|---------|------------------|-------------------|-----|---------------------|
| mouse   | Jackson Labs     | C57BL6/J          | M/F |                     |
|         |                  |                   |     |                     |
|         |                  |                   |     |                     |

### Genetically Modified Animals

|                        | Species                                                                                                             | Vendor or Source | Background Strain | Other Information | Persistent ID / URL |
|------------------------|---------------------------------------------------------------------------------------------------------------------|------------------|-------------------|-------------------|---------------------|
| <b>Parent - Male</b>   | <i>Ldlr</i> <sup>-/-</sup> <i>Apob</i> <sup>100/100</sup> <i>MtTp</i> <sup>fl/fl</sup> <i>Mx1Cre</i> <sup>+/+</sup> | Jackson Labs     | C57BL6/J          |                   |                     |
| <b>Parent - Female</b> | <i>Ldlr</i> <sup>-/-</sup> <i>Apob</i> <sup>100/100</sup> <i>MtTp</i> <sup>fl/fl</sup> <i>Mx1Cre</i> <sup>+/+</sup> | Jackson Labs     | C57BL6/J          |                   |                     |

### Antibodies

| Target antigen      | Vendor or Source  | Catalog #  | Working concentration                    | Lot # (preferred but not required) | Persistent ID / URL |
|---------------------|-------------------|------------|------------------------------------------|------------------------------------|---------------------|
| CD25                | Biolegend         | 102040     | 2.5 mg/ml (100ul)                        |                                    |                     |
| isotype control IgG | Biolegend         | 401916     | 2.5 mg/ml (100ul)                        |                                    |                     |
| CD45                | Biolegend         | 103132     | ≤0.25 µg/10 <sup>6</sup> cells in 100 µl |                                    |                     |
| CD3                 | Biolegend         | 100216     | ≤1.0 µg/10 <sup>6</sup> cells in 100 µl  |                                    |                     |
| CD4                 | Biolegend         | 100548     | ≤0.25 µg/10 <sup>6</sup> cells in 100 µl |                                    |                     |
| CD25                | Biolegend         | 101910     | ≤0.25 µg/10 <sup>6</sup> cells in 100 µl |                                    |                     |
| CD11b               | Biolegend         | 101239     | ≤0.25 µg/10 <sup>6</sup> cells in 100 µl |                                    |                     |
| F4/80               | Biolegend         | 123141     | ≤0.5 µg/10 <sup>6</sup> cells in 100 µl  |                                    |                     |
| Ly6C                | Biolegend         | 128030     | ≤0.5 µg/10 <sup>6</sup> cells in 100 µl  |                                    |                     |
| Nrp1                | Biolegend         | 145209     | 5 µl/10 <sup>6</sup> cells in 100 µl     |                                    |                     |
| FoxP3               | Biolegend         | 126419     | ≤0.5 µg/10 <sup>6</sup> cells in 100 µl  |                                    |                     |
| T-bet               | Biolegend         | 644815     | ≤0.5 µg/10 <sup>6</sup> cells in 100 µl  |                                    |                     |
| Gata3               | BD Bioscience     | 565445     | ≤0.5 µg/10 <sup>6</sup> cells in 100 µl  |                                    |                     |
| RORgd               | ThermoFisher      | 17-6981-82 | ≤0.5 µg/10 <sup>6</sup> cells in 100 µl  |                                    |                     |
| Ki67                | Abcam             | Ab16667    | 1:250                                    |                                    |                     |
| CD68                | BioRad            | MCA1957    | 1:50                                     |                                    |                     |
| Mac2                | Biolegend         | 677302     | 1 µg/ml                                  |                                    |                     |
| MR1                 | BioRad            | MCA2235    | 1:50                                     |                                    |                     |
| Arg1                | ThermoFisher      | 53-3697-82 | ≤0.5 µg/10 <sup>6</sup> cells in 100 µl  |                                    |                     |
| FoxP3               | ThermoFisher      | 17-5773-82 | 1:250                                    |                                    |                     |
| CD28                | Biolegend         | 102102     | 1 µg/mL                                  |                                    |                     |
| CD3                 | Biolegend         | 100302     | 0.25 µg/mL                               |                                    |                     |
| phalloidin          | Life Technologies | A12379     | 1:500                                    |                                    |                     |
|                     |                   |            |                                          |                                    |                     |
|                     |                   |            |                                          |                                    |                     |
|                     |                   |            |                                          |                                    |                     |

DOI [to be added]

**DNA/cDNA Clones**

| <b>Clone Name</b> | <b>Sequence</b> | <b>Source / Repository</b> | <b>Persistent ID / URL</b> |
|-------------------|-----------------|----------------------------|----------------------------|
| n/a               |                 |                            |                            |
|                   |                 |                            |                            |
|                   |                 |                            |                            |

**Cultured Cells**

| <b>Name</b> | <b>Vendor or Source</b> | <b>Sex (F, M, or unknown)</b> | <b>Persistent ID / URL</b> |
|-------------|-------------------------|-------------------------------|----------------------------|
| n/a         |                         |                               |                            |
|             |                         |                               |                            |
|             |                         |                               |                            |

**Data & Code Availability**

| <b>Description</b>       | <b>Source / Repository</b> | <b>Persistent ID / URL</b> |
|--------------------------|----------------------------|----------------------------|
| Single cell RNA-Seq data | Gene Expression<br>Omnibus | GSE141038                  |
|                          |                            |                            |
|                          |                            |                            |

**Other**

| <b>Description</b>             | <b>Source / Repository</b> | <b>Persistent ID / URL</b> |
|--------------------------------|----------------------------|----------------------------|
| ApoB-antisense oligonucleotide | Ionis Pharmaceuticals      |                            |
|                                |                            |                            |
|                                |                            |                            |
