# Supplementary material
Source: PubMed Central journal article supplement (PMC7367765)
Supplement: NIHMS1588574-supplement-316461_Online.pdf [file NIHMS1588574-supplement-316461_Online.pdf]

## SUPPLEMENTAL MATERIAL

### **Regulatory T cells license macrophage pro-resolving functions during atherosclerosis regression**

Monika Sharma<sup>1</sup>, Martin Schlegel<sup>1</sup>, Milessa S. Afonso<sup>1</sup>, Emily J. Brown<sup>1</sup>, Karishma Rahman<sup>1</sup>, Ada Weinstock<sup>1</sup>, Brian E. Sansbury<sup>2</sup>, Emma M. Corr<sup>1</sup>, Coen van Solingen<sup>1</sup>, Graeme J. Koelwyn<sup>1</sup>, Lianne C. Shanley<sup>1</sup>, Lauren Beckett<sup>1</sup>, Daniel Peled<sup>1</sup>, Juan J. Lafaille<sup>3</sup>, Matthew Spite<sup>2</sup>, P'ng Loke<sup>4</sup>, Edward A. Fisher<sup>1,5</sup>, Kathryn J. Moore<sup>1,5</sup>

<sup>1</sup>Department of Medicine, Leon H. Charney Division of Cardiology, New York University Grossman School of Medicine, New York, 10016, USA.

<sup>2</sup>Center for Experimental Therapeutics and Reperfusion Injury, Department of Anesthesiology, Perioperative and Pain Medicine, Brigham and Women's Hospital and Harvard Medical School, Boston MA 02115, USA.

<sup>3</sup>Department of Pathology, Kimmel Center for Biology and Medicine at the Skirball Institute, New York University School of Medicine, New York, NY, 10016, USA.

<sup>4</sup>Department of Microbiology (Parasitology), New York University School of Medicine, New York, NY, 10016, USA.

<sup>5</sup>Department of Cell Biology, New York University Grossman School of Medicine, New York, 10016, USA.

## Online Figure I

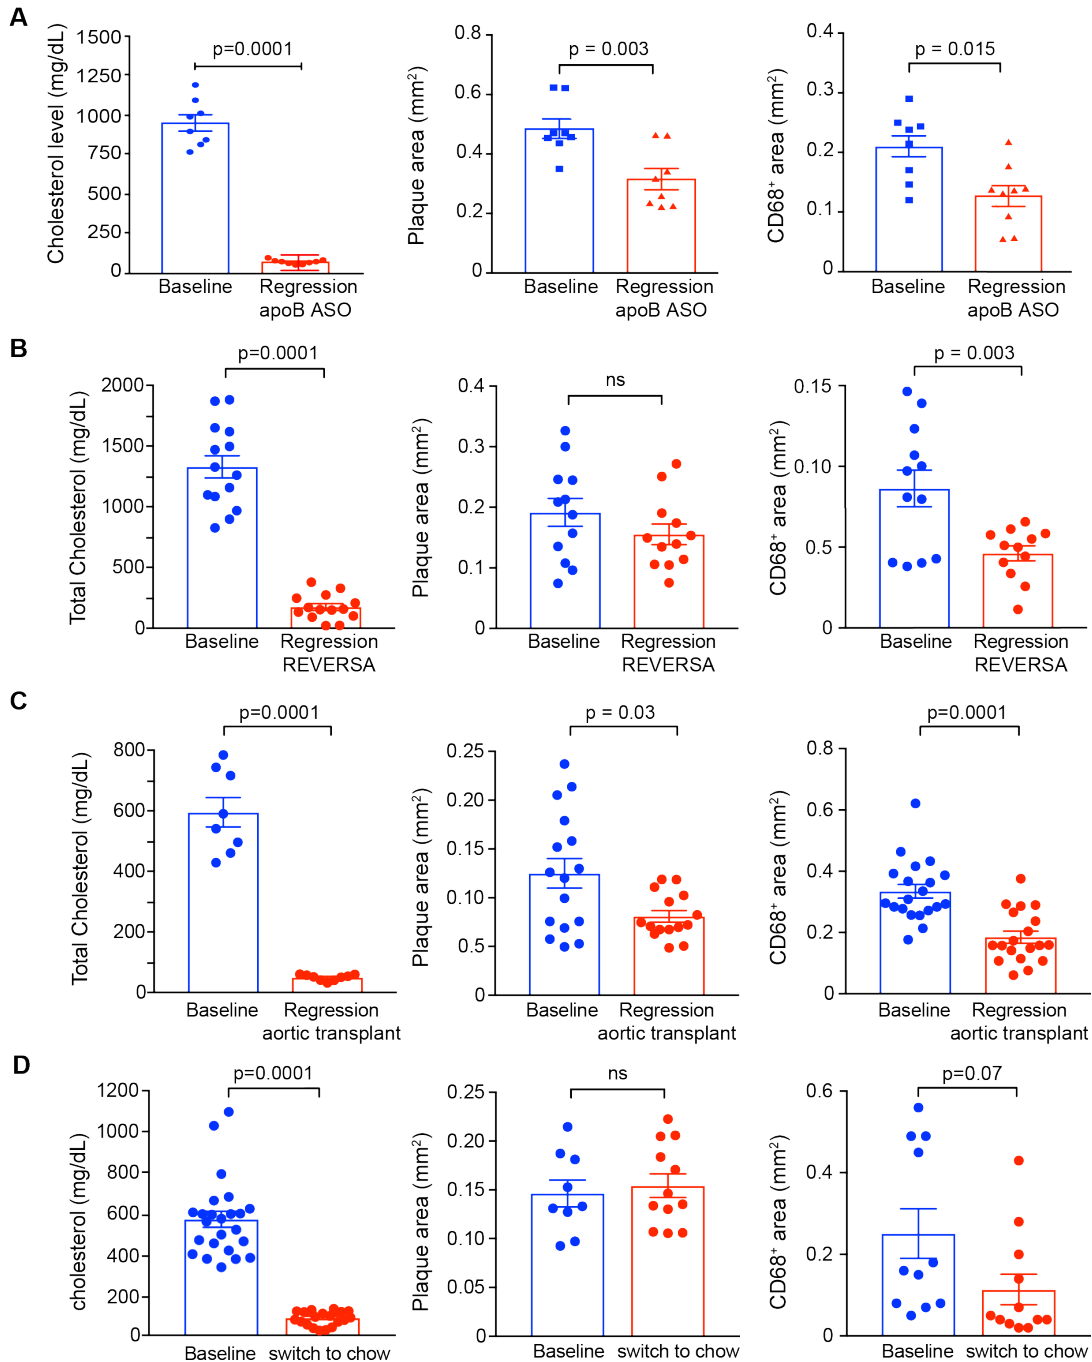

**Online Figure I.** Quantification of total cholesterol, lesion area and immunohistochemical staining for the macrophage marker, CD68 in cross-sections of the, **A)** aortic root of atherosclerotic C57BL/J6 mice at baseline (AAV-PCSK9 and western diet for 20 weeks) and 3 weeks after lipid lowering using apoB-ASO (regression),  $n=8-9$  mice/group. **B)** aortic root of atherosclerotic REVERSA mice at baseline (16 weeks WD) and 4 weeks after lipid lowering by MTP deletion (regression),  $n=12-14$  mice/group. **C)** aortic arch of atherosclerotic *ApoE*<sup>-/-</sup> mice (16 weeks WD) after transplant to WT (regression),  $n=8-10$ /group for cholesterol assays;  $n=18-20$ /group for lesion area and immunostaining. **D)** aortic root of atherosclerotic C57BL/J6 mice at baseline (AAV-PCSK9 and western diet for 20 weeks) and 3 weeks after switching to chow diet to halt the plaque progression.  $n=20-24$ /group for cholesterol assays;  $n=10-14$ /group for lesion area and immunostaining. Data is expressed as mean  $\pm$  s.e.m. P values were determined by a Student's t-test.

## Online Figure II

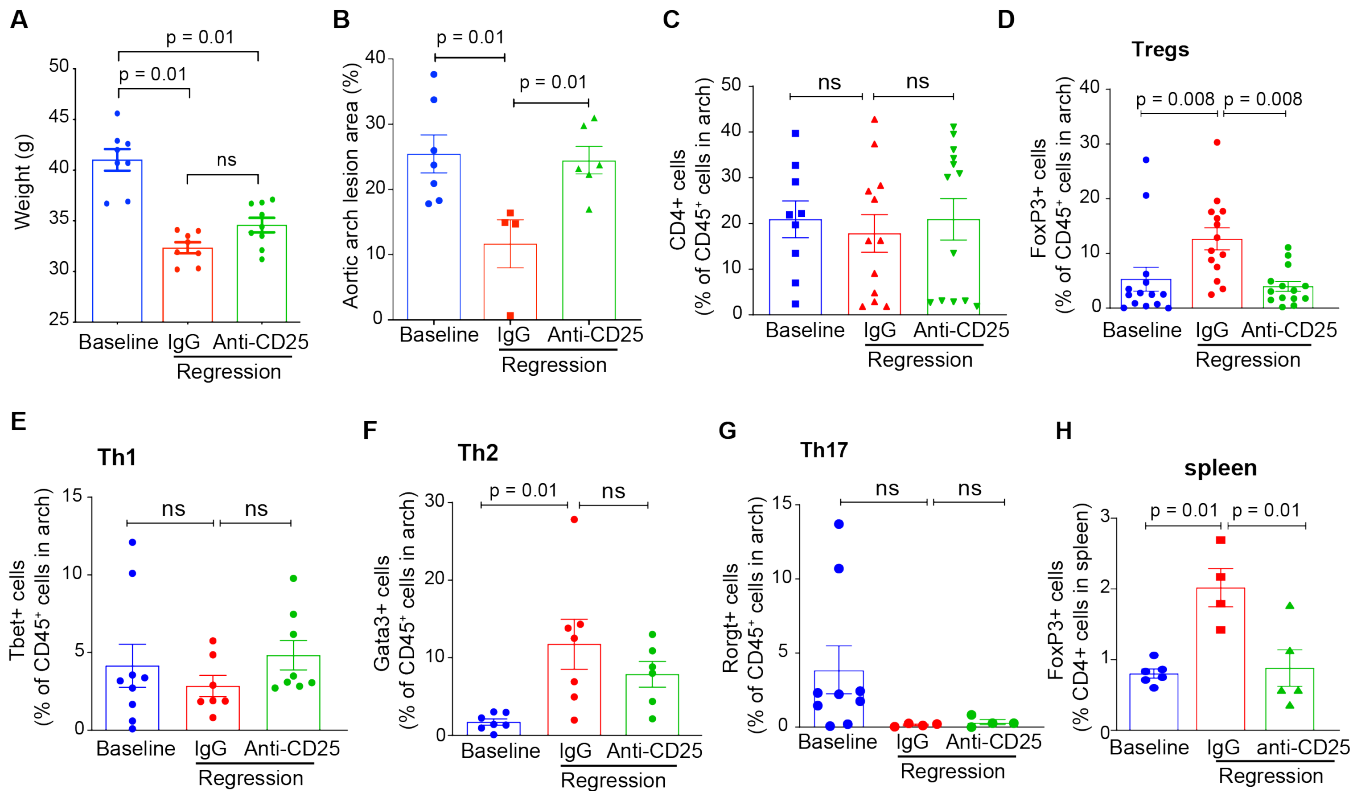

**Online Figure II.** **A)** Body weight, **B)** Quantification of lesion area of the aortic arch by *en face* analysis, and **C-G)** Quantification of CD4<sup>+</sup> T cell subsets as a % of CD45<sup>+</sup> cells in aortic arch plaques by flow cytometric analysis in mice at baseline and after regression + IgG or anti-CD25 treatment (n=9-12 mice/group). **C)** CD4<sup>+</sup> cells, **D)** FoxP3<sup>+</sup>, **E)** Tbet<sup>+</sup>, **F)** Gata3<sup>+</sup> and **G)** RORγδ<sup>+</sup>. **H)** Flow cytometric quantification of FoxP3<sup>+</sup> T cells in the spleen of mice at baseline and after regression + IgG or anti-CD25 treatment (n=4-6 mice/group). Data are mean ± SEM. P values were determined by a one-way ANOVA with post-hoc Sidak's test.

## Online Figure III

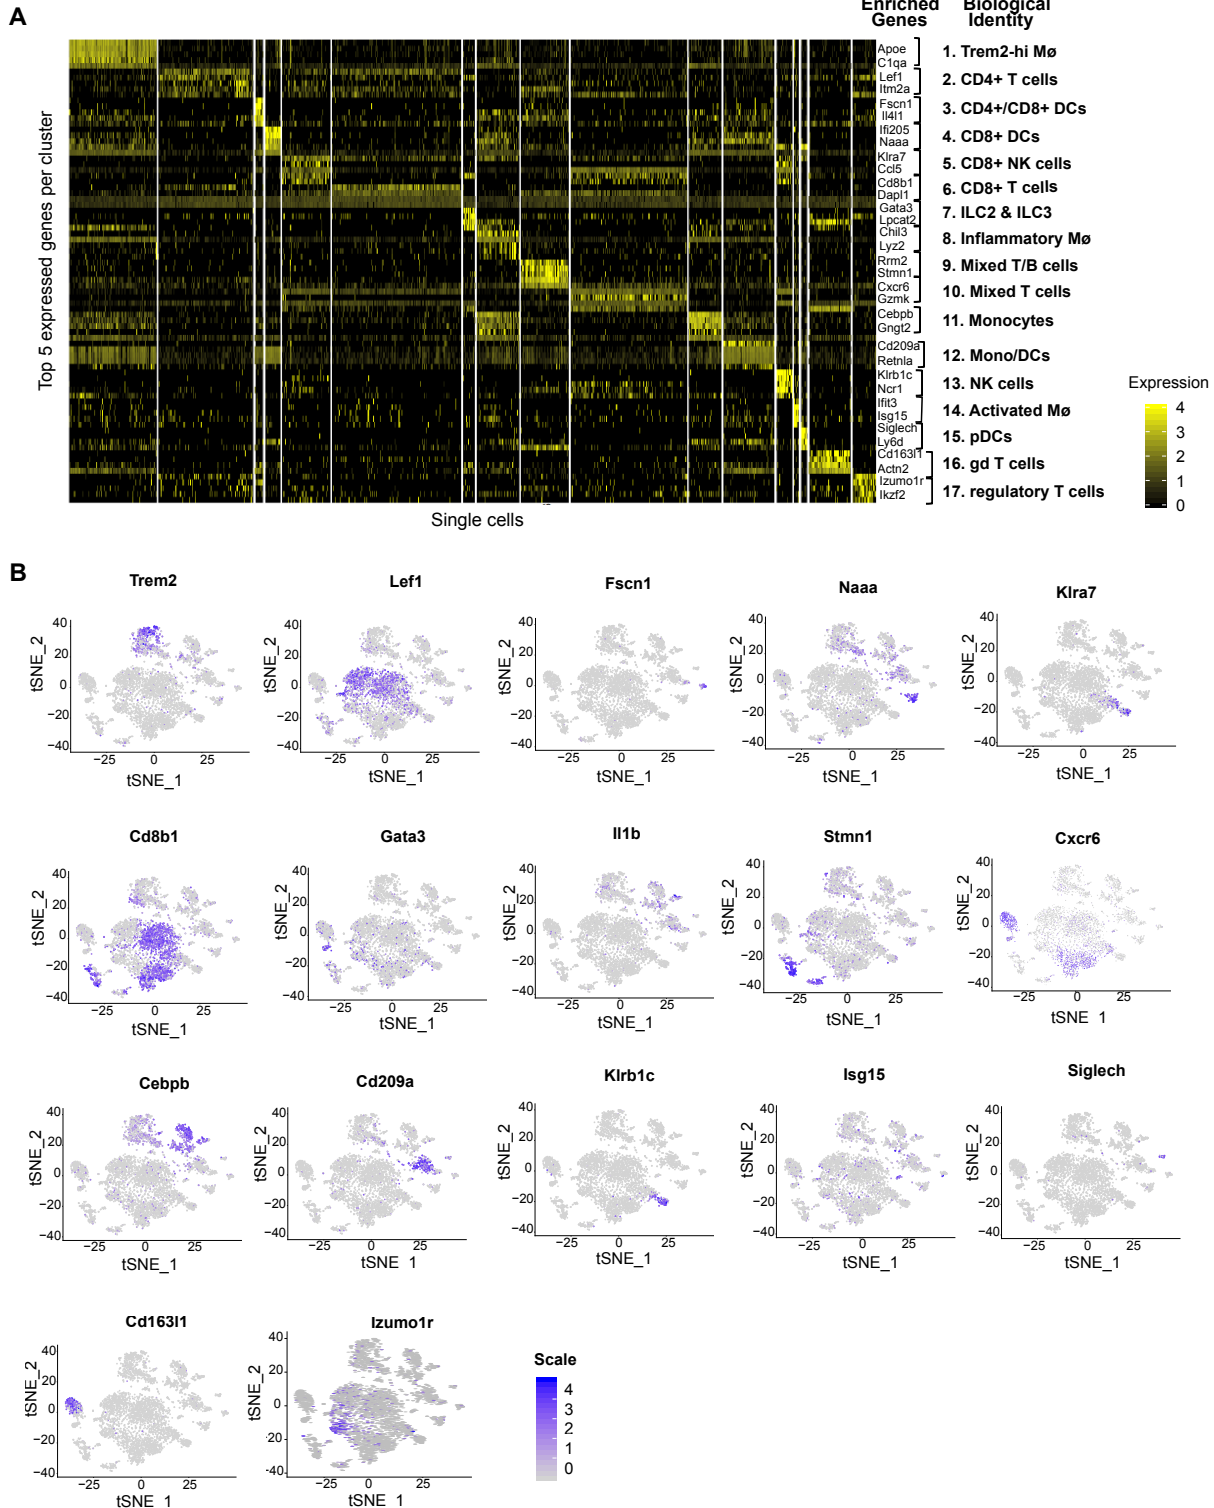

**Online Figure III. A)** Heatmap showing the 5 most highly expressed genes (ordered by decreasing p value) in each cluster ( $n=17$ ) and top 2 selected enriched genes used for the biological identification of each cluster (scale:  $\log_2$  fold change) identified from single-cell RNA-sequencing of CD45<sup>+</sup> cells from aortic arches from baseline, IgG regression and anti-CD25 regression mice groups. Data was analyzed by Seurat. **B)** Gene expression patterns projected onto t-SNE plots of *Trem2*, *Lef1*, *Fcscn1*, *Naaa*, *Klra7*, *Cd8b1*, *Gata3*, *Il1b*, *Stmn1*, *Cxcr6*, *Cebpb*, *Cd209a*, *Klrb1c*, *Isg15*, *Siglech*, *Cd163l1* and *Izumo1r* (scale: log-transformed gene expression).



## Online Figure IV

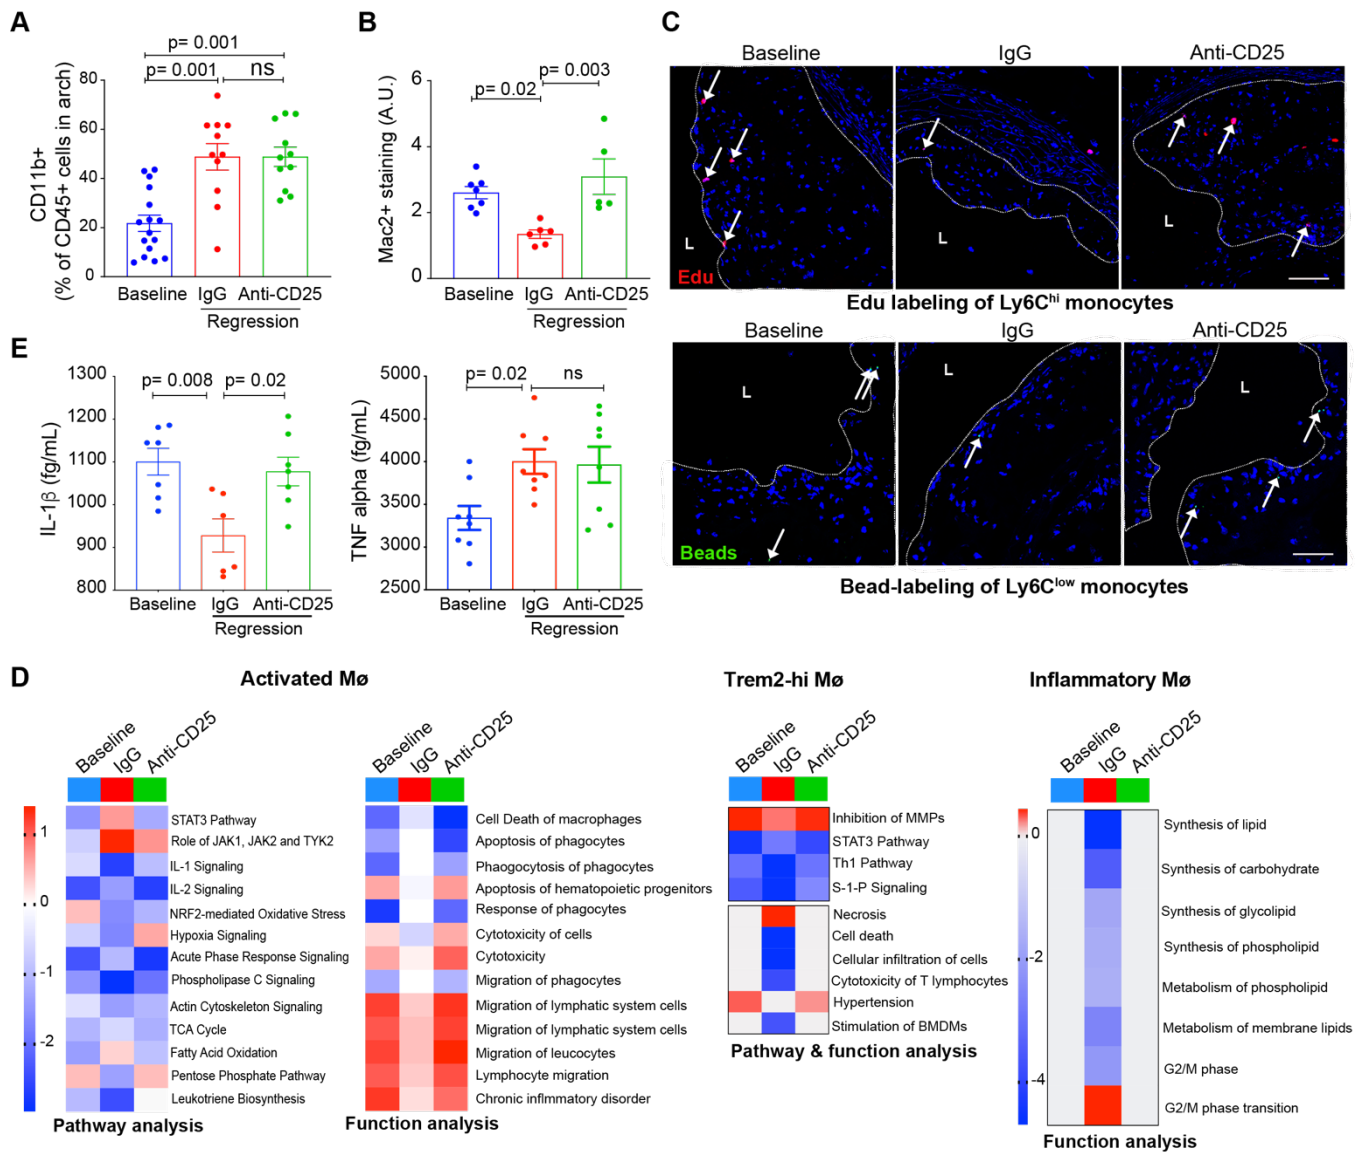

**Online Figure IV. A)** Flow cytometric quantification of CD11b<sup>+</sup> cells as a % of CD45<sup>+</sup> cells in aortic arch plaques in mice at baseline and after regression + IgG or anti-CD25 treatment (n=11-16 mice/group). **B)** Quantification of immunohistochemical staining for the macrophage marker Mac2 in aortic root plaques of mice at baseline and after regression + IgG or anti-CD25 treatment (n=5-7 mice/group). **C)** Representative images of Edu-labeled Ly6C<sup>hi</sup> monocyte-derived macrophages and bead-labeled Ly6C<sup>low</sup> monocyte-derived macrophages in aortic root plaques 21 days after pulse-labeling. **D)** Signaling pathway and molecular function analysis of activated macrophages, Trem2-hi macrophages, and inflammatory macrophages clusters from single-cell RNA-sequencing of CD45<sup>+</sup> cells from digested aortic arches from baseline, IgG regression and anti-CD25 regression mice groups, analyzed using IPA. **E)** Plasma IL-1 $\beta$  and TNF- $\alpha$  levels as measured by CBA assay, in mice at baseline and after regression + IgG or anti-CD25 treatment, n= 6-7 mice per group. Data are mean  $\pm$  SEM. P values were determined by a one-way ANOVA with post-hoc Sidak's test).

## Online Figure V

A

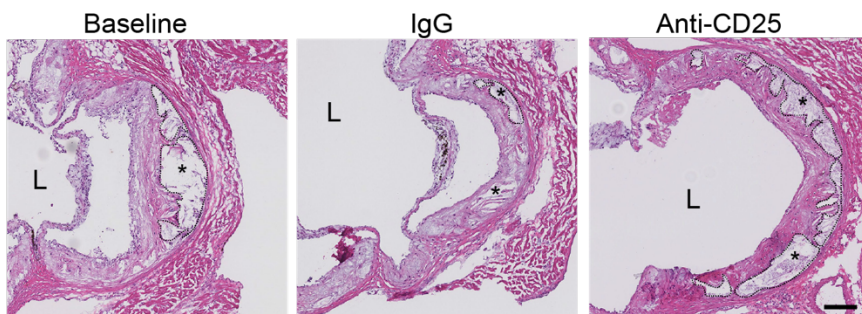

B

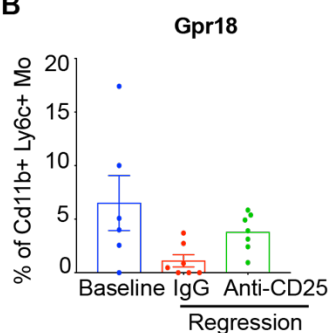

C

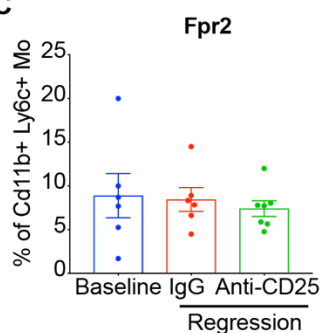

D

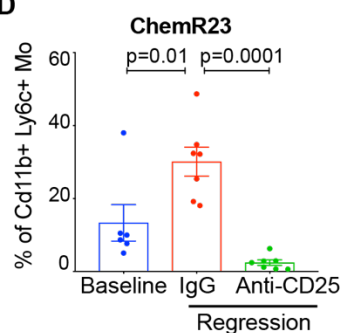

**Online Figure V. A)** Representative images of atherosclerotic plaques used for quantification of necrotic area. **B-C)** Quantification of **B)** Gpr18, **C)** Fpr2 and **D)** ChemR23 receptor expression in Ly6C+ monocytes in the digested aortic arches of baseline, IgG regression and anti-CD25 regression mice by flow cytometric analysis. Data are mean  $\pm$  SEM. P values were determined by a one-way ANOVA with post-hoc Sidak's test.

**Online Figure VI.** Gating strategy for flow cytometer as shown for CD45, CD4, Foxp3, T-bet, Gata3, RORgd, CD11b+ F4/80+ and CD11b+ Ly6C+ populations performed by Flowjo analysis.

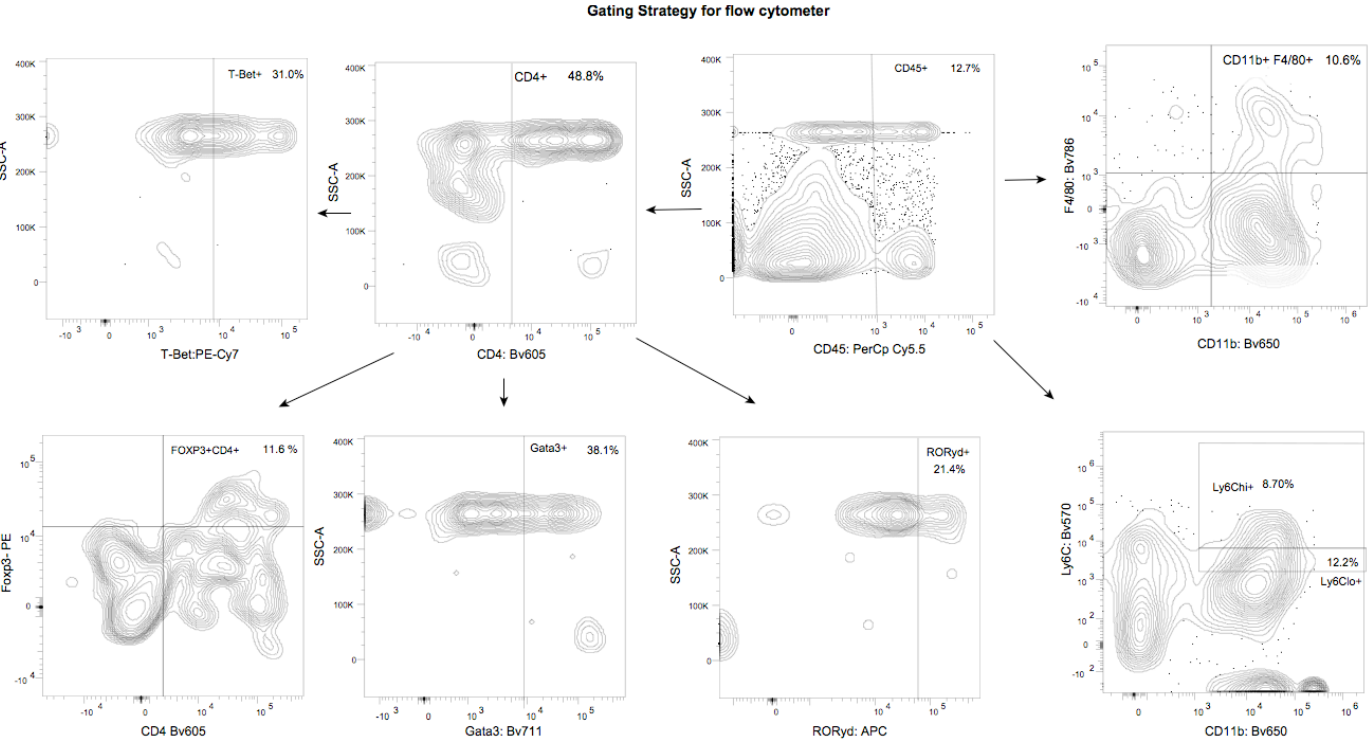

| Gene      | logFC | Pvalue   | Gene          | logFC | Pvalue   |
|-----------|-------|----------|---------------|-------|----------|
| Lgals3    | 1.01  | 1.05E-03 | Jumb          | -2.40 | 2.83E-15 |
| Gzma      | 0.97  | 7.49E-01 | Dusp1         | -2.14 | 6.64E-10 |
| Ccl4      | 0.86  | 2.13E-01 | Fos           | -1.88 | 1.81E-05 |
| C1qc      | 0.83  | 7.07E-02 | Rgs1          | -1.31 | 1.69E-03 |
| C1qb      | 0.74  | 8.67E-01 | Ppp1r15a      | -1.28 | 2.04E-04 |
| Mxra7     | 0.68  | 2.83E-02 | Jund          | -1.22 | 1.92E-07 |
| Rfx12     | 0.68  | 1.39E-05 | Jun           | -1.17 | 8.38E-04 |
| Uba52     | 0.63  | 2.75E-05 | Cd69          | -1.13 | 7.00E-04 |
| Cd40lg    | 0.60  | 4.21E-03 | Klf6          | -1.13 | 1.82E-03 |
| Tyrobp    | 0.58  | 1.15E-01 | Nfkbia        | -1.12 | 3.56E-03 |
| Lef1      | 0.58  | 4.74E-03 | Rgs2          | -1.06 | 1.92E-02 |
| H2-Eb1    | 0.57  | 5.79E-01 | Blg2          | -1.02 | 3.91E-04 |
| Cst1      | 0.57  | 4.82E-01 | Ptn1          | -0.94 | 4.89E-03 |
| Rpl39     | 0.56  | 8.98E-05 | Penk          | -0.87 | 1.48E-01 |
| Silpb     | 0.54  | 6.94E-02 | Socs3         | -0.86 | 7.05E-03 |
| Klra3     | 0.54  | 1.58E-02 | Socs1         | -0.84 | 4.44E-03 |
| Hmggn1    | 0.53  | 2.81E-02 | Ccr7          | -0.80 | 5.45E-03 |
| C1qa      | 0.52  | 3.04E-01 | Ctla4         | -0.78 | 4.10E-02 |
| Cbx3      | 0.52  | 2.17E-02 | Dap1          | -0.77 | 2.54E-02 |
| Gm8730    | 0.50  | 2.09E-03 | Irf2          | -0.77 | 5.59E-03 |
| Gm10116   | 0.50  | 2.62E-02 | Tmcc1         | -0.72 | 2.66E-02 |
| Gm9844    | 0.49  | 3.55E-03 | Hbb-bs        | -0.71 | 2.14E-02 |
| Gm10076   | 0.49  | 4.33E-05 | Prdx5         | -0.70 | 7.96E-03 |
| Drosna    | 0.48  | 6.36E-01 | Rasgrp1       | -0.69 | 8.84E-03 |
| Dynl1     | 0.48  | 8.04E-04 | Igfb          | -0.69 | 2.43E-02 |
| Rpl2      | 0.48  | 3.95E-05 | Alp11b        | -0.64 | 4.09E-02 |
| I4        | 0.47  | 1.84E-03 | Cd83          | -0.64 | 1.99E-01 |
| Rpl38     | 0.46  | 8.38E-05 | Serpina3g     | -0.62 | 9.27E-02 |
| Ptma      | 0.46  | 7.66E-04 | Zfp361        | -0.62 | 4.19E-03 |
| Mif       | 0.46  | 6.79E-02 | Cd28          | -0.60 | 6.03E-03 |
| Rps26     | 0.46  | 3.37E-03 | Ctsd          | -0.60 | 3.17E-02 |
| S100a4    | 0.45  | 1.44E-02 | Gsr           | -0.58 | 7.58E-02 |
| Npm1      | 0.44  | 2.39E-03 | Cd27          | -0.58 | 1.01E-02 |
| Rgs12     | 0.44  | 2.77E-02 | Gm445g        | -0.56 | 1.46E-01 |
| Rps28     | 0.44  | 2.38E-06 | Lag3          | -0.54 | 3.95E-02 |
| Rln3      | 0.44  | 8.14E-02 | Hspa5         | -0.54 | 1.85E-02 |
| Rpl36     | 0.43  | 2.45E-04 | B4galnt1      | -0.54 | 2.82E-02 |
| Ran       | 0.42  | 4.80E-03 | Zfp362        | -0.53 | 1.54E-02 |
| Jchain    | 0.42  | 1.24E-02 | Bhlhe40       | -0.53 | 2.84E-01 |
| Fchs2     | 0.42  | 7.95E-02 | Irfp1         | -0.52 | 7.81E-02 |
| Bank1     | 0.41  | 1.58E-02 | Nrp1          | -0.52 | 4.40E-02 |
| Tsln2     | 0.41  | 5.78E-02 | Ptfn6         | -0.52 | 4.14E-02 |
| Ccl3      | 0.41  | 2.28E-01 | Pmaip1        | -0.51 | 8.39E-02 |
| Bst2      | 0.41  | 3.99E-02 | Sod2          | -0.51 | 2.14E-01 |
| Ly6a      | 0.41  | 4.38E-02 | Neat1         | -0.51 | 7.43E-02 |
| Rps23     | 0.41  | 3.35E-05 | Sdc4          | -0.50 | 2.39E-01 |
| Irf7      | 0.40  | 1.73E-01 | Irf2          | -0.50 | 1.38E-01 |
| Mmp12     | 0.39  | 2.96E-02 | Seip1         | -0.49 | 1.60E-01 |
| Cd14      | 0.39  | 5.04E-02 | Ptpr22        | -0.49 | 1.99E-01 |
| Rpl15     | 0.38  | 9.56E-04 | Klra1         | -0.49 | 6.80E-01 |
| Hbb-bt    | 0.38  | 1.58E-02 | Z310001H17Rik | -0.49 | 8.76E-02 |
| Gm9493    | 0.38  | 7.26E-03 | Phlda1        | -0.48 | 1.70E-01 |
| Rps10     | 0.38  | 3.16E-02 | Ccl6          | -0.48 | 1.29E-01 |
| Rpl35     | 0.38  | 2.56E-03 | Pou2f2        | -0.47 | 1.81E-01 |
| Fcgr1g    | 0.37  | 8.80E-01 | Gm8369        | -0.47 | 1.48E-01 |
| Itih2a    | 0.37  | 7.52E-01 | Blg1          | -0.47 | 8.39E-04 |
| Ifi30     | 0.37  | 6.15E-03 | Batf          | -0.47 | 3.25E-01 |
| Nebi      | 0.37  | 5.09E-03 | Klf2          | -0.47 | 5.98E-03 |
| Irf2      | 0.37  | 3.03E-01 | Erd1          | -0.46 | 1.35E-01 |
| Rps15a    | 0.36  | 3.58E-03 | Ptger2        | -0.46 | 2.58E-01 |
| Ahr       | 0.36  | 5.04E-02 | Cdnp          | -0.46 | 2.55E-01 |
| Edem2     | 0.36  | 8.07E-02 | Ecm1          | -0.45 | 3.60E-02 |
| Rpl41     | 0.36  | 8.18E-05 | Malat1        | -0.45 | 5.81E-06 |
| Rps4x     | 0.36  | 4.38E-03 | Bambi         | -0.45 | 3.12E-01 |
| Rps20     | 0.36  | 1.27E-02 | Rgs16         | -0.44 | 1.69E-01 |
| Cd247     | 0.35  | 7.94E-02 | Cxcr6         | -0.44 | 7.06E-01 |
| Pamp1     | 0.35  | 7.95E-02 | Nrn1          | -0.44 | 2.76E-01 |
| Rn27a     | 0.35  | 1.17E-03 | Cd57          | -0.43 | 2.73E-02 |
| Igf15     | 0.35  | 4.20E-01 | Socs2         | -0.43 | 7.21E-02 |
| Opc1      | 0.35  | 2.99E-02 | Ralgsa2       | -0.43 | 3.60E-02 |
| Rps7      | 0.35  | 2.11E-02 | Ubc           | -0.43 | 3.93E-03 |
| Sostdc1   | 0.35  | 4.64E-01 | H2-K1         | -0.42 | 2.11E-03 |
| Rpl37a    | 0.35  | 1.20E-04 | Gzmk          | -0.41 | 7.21E-02 |
| Rpl23     | 0.34  | 4.01E-03 | Hexa          | -0.40 | 4.96E-02 |
| C5orf1    | 0.34  | 2.99E-02 | Pdco4         | -0.40 | 5.29E-02 |
| Gm10073   | 0.34  | 1.40E-01 | Gm8367        | -0.40 | 1.84E-01 |
| Cst1r     | 0.34  | 5.06E-01 | Tsc22d3       | -0.39 | 4.62E-02 |
| Cst3      | 0.34  | 7.56E-01 | Ms4a4c        | -0.39 | 2.17E-01 |
| Rpl26     | 0.34  | 4.94E-03 | Epcam         | -0.38 | 1.03E-01 |
| Slc25a5   | 0.34  | 7.96E-02 | Plk3          | -0.38 | 8.15E-01 |
| Tlc39c    | 0.33  | 1.54E-02 | Tnfrsf11      | -0.38 | 7.26E-02 |
| Rps2      | 0.33  | 2.17E-02 | Gzpb1         | -0.38 | 1.03E-01 |
| Rpl221    | 0.33  | 1.05E-01 | Hes11b1       | -0.38 | 4.09E-01 |
| Dek       | 0.33  | 1.54E-01 | Cd79a         | -0.37 | 3.39E-01 |
| Rpl37     | 0.33  | 3.99E-03 | Sfr1          | -0.37 | 1.03E-01 |
| Rpl36a    | 0.33  | 3.70E-02 | Gstm1         | -0.37 | 3.39E-01 |
| Gm43352   | 0.33  | 5.04E-02 | Dusp2         | -0.36 | 7.14E-01 |
| Ust       | 0.33  | 1.71E-01 | Pofr2a        | -0.36 | 1.39E-01 |
| Rpl10     | 0.32  | 3.28E-02 | Msr1b1        | -0.36 | 4.07E-01 |
| Rps24     | 0.32  | 2.38E-02 | Pscam1        | -0.35 | 2.85E-01 |
| Tmem176b  | 0.32  | 1.68E-01 | Sclt1         | -0.35 | 4.90E-01 |
| Gusb      | 0.32  | 6.93E-02 | Sat1          | -0.35 | 4.29E-01 |
| Rbm3      | 0.32  | 3.68E-01 | Irf2          | -0.34 | 5.66E-01 |
| Lgmn      | 0.32  | 4.74E-01 | Apoc4         | -0.34 | 1.46E-01 |
| Rps27     | 0.32  | 1.16E-03 | Izumof1r      | -0.34 | 3.16E-02 |
| Gm11808   | 0.31  | 1.24E-01 | Nt5e          | -0.34 | 3.91E-01 |
| Rps29     | 0.31  | 4.86E-03 | Hmggn3        | -0.34 | 2.45E-01 |
| Rpl23a    | 0.31  | 4.81E-03 | Gimap3        | -0.34 | 6.74E-02 |
| Rpl27     | 0.31  | 6.44E-03 | Fam101b       | -0.34 | 2.25E-01 |
| Cd74      | 0.31  | 7.12E-02 | Angptl2       | -0.34 | 2.51E-01 |
| Gm2000    | 0.31  | 5.16E-02 | H1f0          | -0.34 | 1.88E-01 |
| Lysmd1    | 0.31  | 2.07E-01 | Hba-a1        | -0.33 | 7.21E-02 |
| Lyz2      | 0.31  | 7.75E-01 | Gsm           | -0.33 | 1.91E-01 |
| Pisap     | 0.30  | 5.51E-01 | Lck           | -0.33 | 5.54E-03 |
| Cyb5a     | 0.30  | 7.43E-01 | Gm12216       | -0.33 | 1.03E-01 |
| Rplp0     | 0.30  | 5.19E-02 | Rgs10         | -0.32 | 6.04E-01 |
| Ctsc      | 0.30  | 4.29E-01 | Nap           | -0.32 | 2.39E-01 |
| Pla2g7    | 0.30  | 1.58E-02 | Limd2         | -0.32 | 1.91E-02 |
| Lrrc20    | 0.30  | 1.71E-01 | Mnda          | -0.32 | 1.03E-01 |
| Cyb5c3    | 0.30  | 2.43E-01 | Nfkbd         | -0.32 | 5.07E-01 |
| Soc2gh    | 0.30  | 5.15E-01 | Cac2          | -0.31 | 1.46E-01 |
| Pycard    | 0.30  | 1.02E-01 | BC021614      | -0.31 | 3.03E-01 |
| Rps3a1    | 0.30  | 2.18E-03 | Cfp           | -0.31 | 7.21E-02 |
| Anp32a    | 0.30  | 8.90E-02 | Tmpo          | -0.31 | 2.38E-01 |
| Tmem123   | 0.30  | 6.55E-02 | Sepp1         | -0.31 | 3.47E-01 |
| Sh3h1     | 0.30  | 1.71E-01 | Sh2d2a        | -0.31 | 5.14E-01 |
| Cd7       | 0.29  | 6.94E-02 | Serpinc1b9    | -0.30 | 1.46E-01 |
| Crip2     | 0.29  | 8.14E-02 | Bcl2a1b       | -0.30 | 3.74E-01 |
| Tox       | 0.29  | 2.00E-01 | Ccnd2         | -0.30 | 2.22E-01 |
| Cd24a     | 0.28  | 5.04E-02 | Tnfrsf4       | -0.29 | 7.72E-01 |
| Ly86      | 0.28  | 5.04E-02 | Tuba1b        | -0.29 | 6.82E-01 |
| Capn3     | 0.28  | 4.05E-01 | Trp53inp1     | -0.28 | 5.22E-01 |
| S100a11   | 0.28  | 3.07E-01 | Apoe          | -0.28 | 3.04E-01 |
| Tmem10    | 0.28  | 1.41E-02 | Alp11b1       | -0.28 | 1.86E-01 |
| Rps8      | 0.28  | 2.51E-02 | Mdfe          | -0.28 | 2.15E-01 |
| Ly6k      | 0.28  | 3.12E-02 | Ctsz          | -0.28 | 4.71E-01 |
| H2-Ab1    | 0.28  | 3.72E-01 | Tnfr8         | -0.27 | 2.62E-01 |
| Rpl17     | 0.28  | 1.15E-02 |               |       |          |
| Retna     | 0.27  | 9.44E-02 |               |       |          |
| Hspa90ab1 | 0.27  | 9.62E-02 |               |       |          |
| Rpsa      | 0.27  | 2.87E-02 |               |       |          |
| Nfatc1    | 0.27  | 3.57E-01 |               |       |          |
| Gmfg      | 0.27  | 5.90E-01 |               |       |          |
| Gm11707   | 0.27  | 4.29E-01 |               |       |          |

**Online Table I.** Differential gene expression of aortic Tregs isolated from progressing and regressing plaques. Genes with induced expression in regressing compared to progressing plaques are shown under the red header; genes with reduced expression are shown under the blue header. Data are expressed as average log fold change (FC) of regression plaques versus progressing plaques. Non-adjusted P values were calculated using the Wilcoxon rank-sum test.
